1 **Title:**

2 **Ultrasound versus fluoroscopy as imaging guidance for percutaneous nephrolithotomy: A**  
3 **systematic review and meta-analysis**

4 Razman Arabzadeh Bahri<sup>1,2\*</sup>, Saba maleki<sup>3</sup>, Arman Shafiee<sup>4</sup>, Parnian Shobeiri<sup>1</sup>

5 <sup>1</sup> School of Medicine, Tehran University of Medical Science, Tehran, Iran

6 <sup>2</sup> Urology Research Center, Tehran University of Medical Sciences, Tehran, Iran

7 <sup>3</sup> School of Medicine, Guilan University of Medical Sciences (GUMS), Rasht, Guilan Province,  
8 Iran

9 <sup>4</sup> Student Research Committee, School of Medicine, Alborz University of Medical Sciences,  
10 Karaj, Iran

11 Corresponding author\*

12 Email: raz\_bahri@yahoo.com

13 **Abstract**

14 **Objectives:** To determine whether the outcomes of ultrasound-guided percutaneous  
15 nephrolithotomy (UG-PCNL), an alternative to traditional fluoroscopy-guided percutaneous  
16 nephrolithotomy (FG-PCNL), are comparable.

17 **Methods:** A systematic search of PubMed, Embase, and the Cochrane Library was carried out to  
18 discover investigations comparing UG-PCNL to FG-PCNL, and accordingly, a meta-analysis of  
19 those studies was performed. The primary outcomes included the stone-free rate (SFR), overall  
20 complications based on Clavien-Dindo classification, duration of surgery, duration of patients'  
21 hospitalization, and hemoglobin (Hb) drop during the surgery. All statistical analyses and  
22 visualizations were implemented utilizing R software.

23 **Results:** Nineteen studies, including eight randomized clinical trials (RCTs) and eleven  
24 observational cohorts, comprising 3016 patients (1521 UG-PCNL patients) and comparing UG-  
25 PCNL with FG-PCNL met the inclusion criteria of the current study. Considering SFR, overall  
26 complications, duration of surgery, duration of hospitalization, and Hb drop, our meta-analysis  
27 revealed no statistically significant difference between UG-PCNL and FG-PCNL patients, with p-  
28 values of 0.29, 0.47, 0.98, 0.28, and 0.42, respectively. Significant differences were discovered  
29 between UG-PCNL and FG-PCNL patients in terms of the length of time they were exposed to  
30 radiation (p-value< 0.0001). Moreover, FG-PCNL had shorter access time than UG-PCNL (p-  
31 value= 0.04).

32 **Conclusion:** UG-PCNL provides the advantage of requiring less radiation exposure while being  
33 just as efficient as FG-PCNL; thus, this study suggests prioritizing the use of UG-PCNL.

1 **Keywords:** Fluoroscopy - Ultrasonography - Nephrolithotomy - Percutaneous - Urinary calculi -  
2 Meta-analysis

3

#### 4 **Introduction**

5 Urolithiasis is a common urological disease with increasing prevalence (1). Percutaneous  
6 nephrolithotomy (PCNL) is a minimally invasive procedure for removing complex or large kidney  
7 stones (2, 3) and is conventionally performed under fluoroscopic guidance. A major concern  
8 related to fluoroscopy-guided percutaneous nephrolithotomy (FG-PCNL) is the effect of exposure  
9 to ionizing radiation by patients, surgeons, and operating room personnel (4, 5). Thus, an  
10 alternative imaging technique for PCNL would be advantageous (6). To avoid radiation exposure,  
11 some surgeons prefer ultrasound-guided percutaneous nephrolithotomy (UG-PCNL) (7). Given  
12 the higher rate of availability of ultrasound (US) devices in most peripheral hospitals, the use of  
13 UG-PCNL also increases the number of PCNL procedures. Also, the total cost of UG-PCNL is  
14 30% less than that of FG-PCNL in every case (8). PCNL is performed in prone, supine, or flank  
15 positions. The prone position is the preferred modality for creating percutaneous access and  
16 localizing stones during FG-PCNL (9) although, in obese patients, it is not an ideal position(10).  
17 UG-PCNL can also be performed in the flank or supine position with a lower risk of complications  
18 during anesthesia(11). There have been various studies, including observational studies or clinical  
19 trials, comparing the feasibility, safety, and efficacy of ultrasound-guided and fluoroscopy-guided  
20 PCNL, but the conclusion has scarce available data and the choice between these modalities is  
21 based on the preference of the urologist. Therefore, updating this data is mandatory. In addition,  
22 there has not been a comprehensive assessment of randomized clinical trials (RCTs) and  
23 observational cohort studies comparing UG-PCNL and FG-PCNL. Therefore, we aimed to  
24 systematically review and conduct a meta-analysis to compare the efficacy of UG-PCNL with FG-  
25 PCNL in different outcomes for the treatment of urolithiasis.

#### 26 **Methods and materials**

27 This study was conducted based on Preferred Reporting Items for Systematic Reviews and Meta-  
28 Analyses (PRISMA) guidelines. The protocol of this study is registered in PROSPERO  
29 (CRD42022327222)

1

## 2 **Search strategy**

3 A comprehensive search was conducted in international databases, including Cochrane library,  
4 PubMed, and Embase, for relevant studies published from the inception to March 19th, 2022. The  
5 search was conducted again for the determination of newly published and relevant studies one  
6 week before the submission of the manuscript. The search keywords were categorized into three  
7 groups: Ultrasound, fluoroscopy, and nephrolithotomy. In the ultrasound group, we used any  
8 possible keywords such as ultrasound, US, ultrasound-guided, ultrasonography, and  
9 ultrasonographic. In the fluoroscopy group, we used all possible keywords, including fluoroscopy,  
10 X-ray, and fluoroscopic. In the nephrolithotomy group, the keywords used in the search strategy  
11 were percutaneous nephrolithotomy, minimally invasive percutaneous nephrolithotomy, and  
12 PCNL. The keywords were combined with “AND” between the groups, and with “OR” in each  
13 group.

14

## 15 **Eligibility criteria**

16 The inclusion criteria for study selection were as follows: (a) patients with urolithiasis condition;  
17 (b) comparison of ultrasound-guided PCNL and fluoroscopy-guided PCNL; (c) reporting of at  
18 least SFR and complication rate, and (d) studies in the English language. The exclusion criteria for  
19 study selection were as follows: (a) non-randomized studies, (b) Meta-analysis studies, and (c)  
20 review studies. No limitation was imposed in this study for study sample sizes and patient  
21 characteristics.

## 22 **Data extraction and quality assessment**

23 The initial screening of studies was carried out by two reviewers independently based on titles and  
24 abstracts to exclude non-related studies. The full text of related studies was then reviewed for  
25 confirmation of eligibility criteria meeting and data extraction. The data extraction of each study  
26 using an Excel-based sheet were checked and discussed by two reviewers independently. The data  
27 sheet included the first author names, type of studies, year of publications, number of patients in  
28 ultrasound and fluoroscopy group, patients’ characteristics, SFRs, PCNL techniques, multiple  
29 stone status, stone burden, hydronephrosis degree, ultrasound probe, sheath size, dilator,

1 complication rate, surgery time and Hb decrease after the surgery. The methodological quality of  
2 the included studies was independently assessed by two reviewers using the national institute of  
3 health (NIH) quality assessment tool for cohort studies and the risk of bias (RoB2) method of the  
4 Cochrane Collaboration for RCTs.

## 5 **Outcomes**

6 Five primary outcomes and five secondary outcomes were evaluated and analyzed. The primary  
7 outcomes included the SFRs, overall complications based on Clavien-Dindo classification,  
8 duration of surgery, duration of patients' hospitalization, and hemoglobin (Hb) drop during the  
9 surgery. The secondary outcomes included need for blood transfusion, fever after the surgery,  
10 radiation exposure of the patients, time to access the stone, and the number of attempts by the  
11 surgeon for the procedure.

## 12 **Statistical analysis**

13 The risk ratio (RR) was used to summarize the pooled effect size of dichotomous outcomes, and  
14 the standardized mean difference (SMD) was used for reporting the results of continuous  
15 outcomes. Study heterogeneity was assessed using the Chi-square test and I<sup>2</sup> statistic, with I<sup>2</sup>  
16 values of <25% indicating a low amount of heterogeneity. A fixed effect meta-analysis was  
17 performed in the case of low heterogeneity; otherwise, a random effect model was used. In order  
18 to investigate any potential effects of the type of study, sub-group analysis was carried out based  
19 on their design (whether a randomized controlled trial (RCT) or an observational cohort).  
20 Publication bias was assessed using funnel plots and Egger's regression test for funnel plot  
21 asymmetry. We did not report publication bias for outcomes with less than ten studies included. A  
22 meta-regression was performed to investigate the possible association between the publication year  
23 as a measure of clinicians' experience in performing US-guided PCNL and the effect size. Meta-  
24 regression analyses were only done on primary outcomes. All statistical analyses and graphics  
25 were carried out using R (version 4.1.3) (R Core Team, 2020) and the meta package.

26

## 27 **Results**

### 28 **Study Characteristics**

1 Nineteen studies, including eight RCTs and eleven observational cohorts comparing UG-PCNL  
2 with FG-PCNL, were included in our study (Fig1). The characteristics of the included studies are  
3 presented in Table1. The first study was published in 2008 and the majority of the studies have  
4 been published in recent years (2016-2021). The sample size of the articles ranged from 45 to 906.  
5 A total of 3016 patients were evaluated in the included studies (of which 1521 patients underwent  
6 UG-PCNL)

## 7 **Primary outcomes**

### 8 **SFR**

9 Eighteen studies comprising 2815 patients (of which 1411 underwent UG-PCNL) were included  
10 in our analysis (12-29). No significant differences were observed in the case of SFR between  
11 ultrasound and fluoroscopy-guided patients (RR: 1.02; 95% CI: 0.98 to 1.06;  $p = 0.29$ ;  $I^2 = 46\%$ )  
12 (Fig. 2-A). Furthermore, no significant between-group differences were observed based on the  
13 study design ( $p = 0.75$ ). Our meta-regression analysis revealed no significant association between  
14 publication year (as a measure of clinicians' experience) and risk of SFR ( $p = 0.81$ ) (Fig. 5). Visual  
15 inspection of the funnel plot revealed no possible source of small study effects (Fig. 3-A). This  
16 was further confirmed by using the Eggers regression test for funnel plot asymmetry ( $p = 0.40$ ).

### 17 **Overall complication**

18 For comparing the rate of complications between groups, studies reporting the outcome of the  
19 Clavien-Dindo classification system were included in this analysis. Sixteen studies reported  
20 compared complications based on this classification (13-24, 26-29). These studies included 1346  
21 and 1339 patients treated with ultrasound and fluoroscopy-guided PCNL, respectively. Meta-  
22 analysis of these studies revealed no significant difference in overall complication (RR: 0.88; 95%  
23 CI: 0.62 to 1.25;  $p = 0.47$ ;  $I^2 = 62\%$ ) (Fig. 2-B). However, the results of our subgroup analysis  
24 showed a significant reduction in the overall complication rate in the ultrasound-guided group  
25 when pooling the results of RCTs independently (RR: 0.73; 95% CI: 0.59 to 0.90;  $I^2 = 6\%$ ). No  
26 significant association between publication year and complication was observed ( $p = 0.80$ ) (Fig.  
27 5). Visual inspection of the funnel plot revealed no possible source of small study effects (Fig. 3-  
28 B). This was further confirmed by using the Eggers regression test for funnel plot asymmetry ( $p =$   
29 0.62).

## 1 **Duration of surgery**

2 Sixteen studies, including 2521 patients (of which 1264 underwent ultrasound-guided PCNL),  
3 were included in our analysis (12, 14-24, 26-29). No significant differences were observed in  
4 operation time between ultrasound and fluoroscopy-guided patients (SMD: 0.00; 95% CI: -0.39 to  
5 0.39;  $p = 0.98$ ;  $I^2 = 89\%$ ) (Fig. 2-C). No significant between-group differences were observed  
6 based on the study design ( $p = 0.35$ ). Our meta-regression revealed a reduced SMD by increasing  
7 publication year (as a measure of clinicians' experience) (Fig. 5). Although this interpretation was  
8 made based on a non-significant result ( $p = 0.37$ ). Visual inspection of the funnel plot revealed no  
9 possible source of small study effects (Fig. 3-C). This was further confirmed by using the Eggers  
10 regression test for funnel plot asymmetry ( $p = 0.58$ ).

## 11 **Duration of hospitalization**

12 Sixteen studies comprising 2345 patients (of which 1126 underwent ultrasound-guided PCNL)  
13 were included in our analysis (12, 14-24, 27-29). No significant differences were observed in  
14 duration of hospitalization between ultrasound and fluoroscopy-guided patients (SMD: -0.09; 95%  
15 CI: -0.27 to 0.08;  $p = 0.28$ ;  $I^2 = 81\%$ ) (Fig. 2-D). The pooled effect size from observational studies  
16 showed a favorable outcome in ultrasound-guided patients (SMD: -0.17; 95% CI: -0.31 to -0.03;  
17  $I^2 = 0\%$ ). Our meta-regression revealed a non-significant association between publication year and  
18 duration of hospitalization ( $p = 0.88$ ) (Fig. 5). Visual inspection of the funnel plot revealed the  
19 presence of small study effects as an indication of publication bias (Fig. 3-D). This was further  
20 confirmed by using the Eggers regression test for funnel plot asymmetry ( $p = 0.001$ ).

## 21 **Hb drop**

22 Twelve studies comprising 2079 patients (of which 998 underwent ultrasound-guided PCNL) were  
23 included (12, 14, 16-18, 20-22, 24, 27-29). Overall, no significant differences were observed in  
24 Hb drop between ultrasound and fluoroscopy-guided patients after their operation (SMD: -0.07;  
25 95% CI: -0.24 to 0.10;  $p = 0.42$ ;  $I^2 = 57\%$ ) (Fig. 2-E). The pooled results of RCTs showed a  
26 favorable outcome in ultrasound-guided patients (SMD: -0.12; 95% CI: -0.22 to -0.01;  $I^2 = 0\%$ ).  
27 Our meta-regression revealed a non-significant association between publication year and duration  
28 of hospitalization ( $p = 0.41$ ) (Fig. 5). Visual inspection of the funnel plot revealed no possible

1 source of small study effects (Fig. 3-E). This was further confirmed by using the Eggers regression  
2 test for funnel plot asymmetry ( $p= 0.65$ ).

### 3 **Secondary outcomes**

#### 4 **Need for blood transfusion**

5 Thirteen studies with 2238 patients (of which 998 underwent UG-PCNL) were included (12, 14,  
6 15, 19-22, 24, 25, 27-30). Overall, no significant differences were observed in blood transfusion  
7 rate between ultrasound and fluoroscopy-guided patients (RR: 0.77; 95% CI: 0.44 to 1.36;  $p =$   
8 0.37;  $I^2 = 51\%$ ) (Fig. 4-A). The pooled results of RCTs showed a reduced need for blood  
9 transfusion in ultrasound-guided patients (RR: 0.42; 95% CI: 0.27 to 0.64;  $I^2 = 10\%$ ). Visual  
10 inspection of the funnel plot revealed no possible source of small study effects (Fig. 3-F). This was  
11 further confirmed by using the Eggers regression test for funnel plot asymmetry ( $p= 0.55$ ).

#### 12 **Fever**

13 Twelve studies with 2103 patients (of which 1010 underwent UG- PCNL) were included (12, 14,  
14 15, 18, 21-25, 27-29). No significant differences were observed between ultrasound and  
15 fluoroscopy-guided patients (RR: 0.97; 95% CI: 0.67 to 1.40;  $p = 0.87$ ;  $I^2 = 39\%$ ) (Fig. 4-B). Our  
16 subgroup analysis showed no significant differences between the results of RCTs and  
17 observational studies (Between groups  $p= 0.36$ ). Visual inspection of the funnel plot revealed no  
18 possible source of small study effects (Fig. 3-G). This was further confirmed by using the Eggers  
19 regression test for funnel plot asymmetry ( $p= 0.17$ ).

#### 20 **Radiation exposure**

21 Seven studies comprising 811 patients (of which 386 underwent UG- PCNL) were included (13,  
22 15-17, 20, 28, 30). When comparing the duration for which patients were exposed to radiation,  
23 significant differences between ultrasound-guided patients and fluoroscopy-guided patients were  
24 found. (SMD: -1.54; 95% CI: -2.29 to -0.79;  $p < 0.0001$ ;  $I^2 = 94\%$ ) (Fig. 4-C).

#### 25 **Access time**

26 Six studies, including 664 patients (of which 330 underwent UG-PCNL), were included (12, 18,  
27 19, 24, 29, 30). Our analysis revealed a shorter time needed for having access through the  
28 fluoroscopy-guided technique. (SMD: 0.85; 95% CI: 0.04 to 1.66;  $p= 0.04$ ;  $I^2 = 95\%$ ) (Fig. 4-D).

## 1 **Number of attempts**

2 Three studies, including 368 patients (of which 184 underwent UG-PCNL), were included (13, 16,  
3 27). No significant differences were observed between ultrasound and fluoroscopy-guided patients  
4 (SMD: -0.51; 95% CI: -2.18 to 1.16; p= 0.54; I2 = 98%) (Fig. 4-E).

## 5 **Discussion**

6 To remove the renal stones, PCNL is offered with the highest SFR alongside high  
7 complication(31). SFR is defined as the absence of residual stones, or the presence of residual  
8 stone fragments less than 4 mm in size in follow-up studies such as kidney ultrasound and non-  
9 contrast computed tomography (CT) (32).

10 The indications for PCNL are stones larger than 20 mm, staghorn, and partial staghorn calculi(33).  
11 The contraindications for PCNL include pregnancy, bleeding disorders, and uncontrolled urinary  
12 tract infections(34).

13 PCNL is an efficient technique for removing large and complex stones with high success and low  
14 morbidity rates(35). PCNL is performed by making a small incision in the flank area under  
15 fluoroscopy or ultrasound guidance(36). PCNL under ultrasound guidance has some advantages,  
16 including the absence of ionizing radiation, shorter time of the procedure, less puncture, and no  
17 more use of contrast agents(37-39). To decrease complications like blood loss, postoperative pain,  
18 and renal damage due to larger instruments, a modification of the standard procedure was  
19 propounded (41). In fluoroscopy-guided PCNL, contrast is injected through a urethral catheter.  
20 Puncture failure and re-do FG-PCNL can be mentioned as a disadvantage of this procedure(40,  
21 41). Some studies mention that UG-PCNL in the flank or the prone position has a higher success  
22 rate and fewer complications compared with FG-PCNL(7, 42). In addition, mini-PCNL is a  
23 standard technique in the treatment of renal and upper ureteric stones using a 28–30 F  
24 ureteroscope(43).

25 In 2018, Yu-Hsiang and his colleagues published a meta-analysis comparing UG-PCNL with FG-  
26 PCNL(44). It had eight included articles, and based on their analysis, they reported that UG-PCNL  
27 had a significantly lower complication rate and also fewer intraoperative complications than FG-  
28 PCNL(45, 46). Accordingly, UG-PCNL was also associated with reduced inadvertent organ injury  
29 risks. Therefore, it can be concluded that ultrasound provides information about the surrounding



1 viscera, determines the depth of needle penetration, and identifies the area posterior to the anterior  
2 calyces when comparing the different complication rates(47). Due to its analysis, UG-PCNL in the  
3 supine position had a higher SFR and significantly lower complication rate than FG-PCNL in the  
4 supine position. According to its results, it did not imply statistically significant differences in  
5 SFR. however, it mentioned if a patient is an appropriate case for a supine position PCNL, like  
6 patients with cardiovascular disease or spinal deformities, UG-PCNL can be a better choice than  
7 FG-PCNL(11, 48). In mini-PCNL, they perform with a smaller percutaneous tract by using a  
8 miniature endoscope. Accordingly, mini-PCNL was associated with less bleeding and  
9 postoperative pain during the procedure(49, 50).

10 We conducted a systematic review and meta-analysis of efficacy and safety in UG-PCNL versus  
11 FG-PCNL with 19 articles included. This study was the first meta-analysis to evaluate ultrasound  
12 versus fluoroscopy as imaging guidance for percutaneous nephrolithotomy, including RCTs and  
13 observational Cohort studies. The sample size of the articles ranged from 45 to 906. A total of  
14 3016 patients were evaluated in the included studies (of which 1521 patients underwent UG-  
15 PCNL). A regression analysis was done based on publication year and approaching recent years,  
16 with increasing experience in performing UG-PCNL. A better result was seen than FG-PCNL.  
17 Outcomes were considered in this meta-analysis in two groups. Each group had five sub-groups.  
18 Primary outcomes included SFR, overall complications, duration of surgery, duration of  
19 hospitalization, and Hb drop. Secondary outcomes considered the need for blood transfusion,  
20 fever, radiation exposure, access time, and the number of attempts. In most outcomes except  
21 radiation exposure and access time, no significant differences were observed between ultrasound  
22 and fluoroscopy-guided studies. Based on our analysis, RCT studies presented fewer complication  
23 rates compared to Cohort studies. In summary, comparing the results of this study to the systematic  
24 review and meta-analysis published in 2018, most outcomes did not display significant differences.  
25 Generally, between these two methods considered in this study, the results were in favor of UG-  
26 PCNL.

## 27 **Limitations**

28 There are multiple reasons for the heterogeneity of the included studies and also the conflicting  
29 results. On the one hand, the patients had different baseline characteristics, including body mass  
30 index and hydronephrosis degree. On the other hand, the procedure was conducted in various

1 positions. In addition, ultrasound is operator-dependent, and its practicality is based on machine  
2 properties and operator expertise.

### 3 **Conclusion**

4 According to the less radiation exposure when using the UG-PCNL technique, we suggest  
5 prioritizing the utilization of UG-PCNL in treating renal stones. Regarding the fact that the  
6 experience and level of expertise of the ultrasound performer may affect the findings, it is  
7 recommended to prepare a program to train people who perform the procedure. This could reduce  
8 the errors, which are mainly due to the lack of organized training programs and sufficient skills.

### 9 **Acknowledgments**

10 We thank all the authors of the included studies and all those who contributed to the present study.

### 11 **Author Contributions**

12 **Conceptualization:** Razman Arabzadeh Bahri.

13 **Data curation:** Razman Arabzadeh Bahri, Saba Maleki, Arman Shafiee.

14 **Formal analysis:** Arman Shafiee.

15 **Investigation:** Razman Arabzadeh Bahri, Saba Maleki.

16 **Methodology:** Arman Shafiee.

17 **Supervision:** Parnian Shobeiri.

18 **Visualization:** Razman Arabzadeh Bahri.

19 **Writing – original draft:** Razman Arabzadeh Bahri, Saba Maleki, Arman Shafiee.

20 **Writing – review & editing:** Razman Arabzadeh Bahri, Saba Maleki, Arman Shafiee, Parnian  
21 Shobeiri.

22

23

24

25

26

27

28

29

1

- 2 1. Ziemba JB, Matlaga BR. Epidemiology and economics of nephrolithiasis. *Investigative and clinical*  
3 *urology*. 2017;58(5):299-306.
- 4 2. Türk C, Petřík A, Sarica K, Seitz C, Skolarikos A, Straub M, et al. EAU guidelines on interventional  
5 treatment for urolithiasis. *European urology*. 2016;69(3):475-82.
- 6 3. Assimos D, Krambeck A, Miller NL, Monga M, Murad MH, Nelson CP, et al. Surgical management  
7 of stones: American urological association/endourological society guideline, PART I. *The Journal of*  
8 *urology*. 2016;196(4):1153-60.
- 9 4. Hidajat N, Wust P, Kreuschner M, Felix R, Schroder R. Radiation risks for the radiologist  
10 performing transjugular intrahepatic portosystemic shunt (TIPS). *The British Journal of Radiology*.  
11 2006;79(942):483-6.
- 12 5. Vano E, Kleiman NJ, Duran A, Romano-Miller M, Rehani MM. Radiation-associated lens opacities  
13 in catheterization personnel: results of a survey and direct assessments. *Journal of Vascular and*  
14 *Interventional Radiology*. 2013;24(2):197-204.
- 15 6. Mancini JG, Raymundo EM, Lipkin M, Zilberman D, Yong D, Bañez LL, et al. Factors affecting  
16 patient radiation exposure during percutaneous nephrolithotomy. *The Journal of urology*.  
17 2010;184(6):2373-7.
- 18 7. Hosseini MM, Hassanpour A, Farzan R, Yousefi A, Afrasiabi MA. Ultrasonography-guided  
19 percutaneous nephrolithotomy. *Journal of endourology*. 2009;23(4):603-7.
- 20 8. Hudnall M, Usawachintachit M, Metzler I, Tzou DT, Harrison B, Lobo E, et al. Ultrasound  
21 guidance reduces percutaneous nephrolithotomy cost compared to fluoroscopy. *Urology*. 2017;103:52-  
22 8.
- 23 9. Ahmad AA, Alhunaidi O, Aziz M, Omar M, Al-Kandari AM, El-Nahas A, et al. Current trends in  
24 percutaneous nephrolithotomy: an internet-based survey. *Therapeutic Advances in Urology*. 2017;9(9-  
25 10):219-26.
- 26 10. Kwee MM, Ho Y-H, Rozen WM. The prone position during surgery and its complications: a  
27 systematic review and evidence-based guidelines. *International surgery*. 2015;100(2):292-303.
- 28 11. Karaolides T, Moraitis K, Bach C, Masood J, Buchholz N. Positions for percutaneous  
29 nephrolithotomy: Thirty-five years of evolution. *Arab Journal of Urology*. 2012;10(3):307-16.
- 30 12. Karami H, Rezaei A, Mohammadhosseini M, Javanmard B, Mazloomfard M, Lotfi B.  
31 Ultrasonography-guided percutaneous nephrolithotomy in the flank position versus fluoroscopy-guided  
32 percutaneous nephrolithotomy in the prone position: a comparative study. *J Endourol*. 2010;24(8):1357-  
33 61.
- 34 13. Agarwal M, Agrawal MS, Jaiswal A, Kumar D, Yadav H, Lavania P. Safety and efficacy of  
35 ultrasonography as an adjunct to fluoroscopy for renal access in percutaneous nephrolithotomy (PCNL).  
36 *BJU Int*. 2011;108(8):1346-9.
- 37 14. Andonian S, Scoffone CM, Louie MK, Gross AJ, Grabe M, Daels FP, et al. Does imaging modality  
38 used for percutaneous renal access make a difference? A matched case analysis. *J Endourol*.  
39 2013;27(1):24-8.
- 40 15. Basiri A, Mirjalili MA, Kardoust Parizi M, Moosa Nejad NA. Supplementary X-ray for ultrasound-  
41 guided percutaneous nephrolithotomy in supine position versus standard technique: a randomized  
42 controlled trial. *Urol Int*. 2013;90(4):399-404.
- 43 16. Jagtap J, Mishra S, Bhattu A, Ganpule A, Sabnis R, Desai MR. Which is the preferred modality of  
44 renal access for a trainee urologist: ultrasonography or fluoroscopy? Results of a prospective  
45 randomized trial. *J Endourol*. 2014;28(12):1464-9.
- 46 17. Chi T, Masic S, Li J, Usawachintachit M. Ultrasound Guidance for Renal Tract Access and Dilation  
47 Reduces Radiation Exposure during Percutaneous Nephrolithotomy. *Adv Urol*. 2016;2016:3840697.

- 1 18. Falahatkar S, Allahkhah A, Kazemzadeh M, Enshaei A, Shakiba M, Moghaddas F. Complete  
2 supine PCNL: ultrasound vs. fluoroscopic guided: a randomized clinical trial. *Int Braz J Urol*.  
3 2016;42(4):710-6.
- 4 19. Hamdy>Aboutaleb M, Mohammed El-Shazly MJAS. Ultrasound versus fluoroscopy guided  
5 percutaneous nephrolithotomy for treatment of calculi in hydronephrotic kidneys. 2016;2:015.
- 6 20. Usawachintachit M, Masic S, Chang HC, Allen IE, Chi T. Ultrasound Guidance to Assist  
7 Percutaneous Nephrolithotomy Reduces Radiation Exposure in Obese Patients. *Urology*. 2016;98:32-8.
- 8 21. Ng FC, Yam WL, Lim TYB, Teo JK, Ng KK, Lim SK. Ultrasound-guided percutaneous  
9 nephrolithotomy: Advantages and limitations. *Investig Clin Urol*. 2017;58(5):346-52.
- 10 22. Sun H, Zhang Z, Huang G, Wan SP, Chen H, He B, et al. Fluoroscopy versus ultrasonography  
11 guided mini-percutaneous nephrolithotomy in patients with autosomal dominant polycystic kidney  
12 disease. *Urolithiasis*. 2017;45(3):297-303.
- 13 23. Sun W, Liu MN, Yang ZW, Wang Q, Xu Y. Ultrasound-guided percutaneous nephrolithotomy for  
14 the treatment in patients with kidney stones. *Medicine (Baltimore)*. 2017;96(51):e9232.
- 15 24. Zhu W, Li J, Yuan J, Liu Y, Wan SP, Liu G, et al. A prospective and randomised trial comparing  
16 fluoroscopic, total ultrasonographic, and combined guidance for renal access in mini-percutaneous  
17 nephrolithotomy. *BJU Int*. 2017;119(4):612-8.
- 18 25. Abed SM, Alhamdani NJIJMS, 18. Ultrasonographic guidance versus fluoroscopic guidance for  
19 renal access in percutaneous nephrolithotomy (PCNL): a comparative study. 2019;335.
- 20 26. Armas-Phan M, Tzou DT, Bayne DB, Wiener SV, Stoller ML, Chi T. Ultrasound guidance can be  
21 used safely for renal tract dilatation during percutaneous nephrolithotomy. *BJU Int*. 2020;125(2):284-91.
- 22 27. Birowo P, Raharja PAR, Putra HWK, Rustandi R, Atmoko W, Rasyid N. X-ray-free ultrasound-  
23 guided versus fluoroscopy-guided percutaneous nephrolithotomy: a comparative study with historical  
24 control. *Int Urol Nephrol*. 2020;52(12):2253-9.
- 25 28. Sahan A, Cubuk A, Ozkaptan O, Ertas K, Canakci C, Eryildirim B, et al. Safety of Upper Pole  
26 Puncture in Percutaneous Nephrolithotomy with the Guidance of Ultrasonography versus Fluoroscopy:  
27 A Comparative Study. *Urol Int*. 2020;104(9-10):769-74.
- 28 29. Eslahi A, Ahmed F, Hosseini MM, Rezaeimehr MR, Fathi N, Nikbakht HA, et al. Minimal invasive  
29 percutaneous nephrolithotomy (Mini-PCNL) in children: Ultrasound versus fluoroscopic guidance. *Arch  
30 Ital Urol Androl*. 2021;93(2):173-7.
- 31 30. Basiri A, Ziaee AM, Kianian HR, Mehrabi S, Karami H, Moghaddam SM. Ultrasonographic versus  
32 fluoroscopic access for percutaneous nephrolithotomy: a randomized clinical trial. *J Endourol*.  
33 2008;22(2):281-4.
- 34 31. Assimos D, Krambeck A, Miller NL, Monga M, Murad MH, Nelson CP, et al. Surgical management  
35 of stones: American urological association/endourological society guideline, PART I. 2016;196(4):1153-  
36 60.
- 37 32. Atis G, Culpan M, Pelit ES, Canakci C, Ulus I, Gunaydin B, et al. Comparison of Percutaneous  
38 Nephrolithotomy and Retrograde Intrarenal Surgery in Treating 20-40 mm Renal Stones. *Urol J*.  
39 2017;14(2):2995-9.
- 40 33. Desai M, Sun Y, Buchholz N, Fuller A, Matsuda T, Matlaga B, et al. Treatment selection for  
41 urolithiasis: percutaneous nephrolithomy, ureteroscopy, shock wave lithotripsy, and active monitoring.  
42 *World journal of urology*. 2017;35(9):1395-9.
- 43 34. Preminger GM, Assimos DG, Lingeman JE, Nakada SY, Pearle MS, Wolf JS. Chapter 1: AUA  
44 guideline on management of staghorn calculi: diagnosis and treatment recommendations. *The Journal  
45 of urology*. 2005;173(6):1991-2000.
- 46 35. Sun W, Liu M-n, Yang Z-w, Wang Q, Xu Y. Ultrasound-guided percutaneous nephrolithotomy for  
47 the treatment in patients with kidney stones. *Medicine*. 2017;96(51).

- 1 36. Fernström I, Johansson B. Percutaneous pyelolithotomy: a new extraction technique.  
2 Scandinavian journal of urology and nephrology. 1976;10(3):257-9.
- 3 37. Zegel H, Pollack H, Banner M, Goldberg B, Arger P, Mulhern C, et al. Percutaneous nephrostomy:  
4 comparison of sonographic and fluoroscopic guidance. American Journal of Roentgenology.  
5 1981;137(5):925-7.
- 6 38. Basiri A, Ziaee SAM, Nasseh H, Kamranmanesh M, Masoudy P, Heidary F, et al. Totally  
7 ultrasonography-guided percutaneous nephrolithotomy in the flank position. Journal of endourology.  
8 2008;22(7):1453-8.
- 9 39. Gupta S, Gulati M, Suri S. Ultrasound-guided percutaneous nephrostomy in non-dilated  
10 pelvicaliceal system. Journal of clinical ultrasound. 1998;26(3):177-9.
- 11 40. HamdyAboutaleb M, Mohammed El-Shazly M. Ultrasound versus fluoroscopy guided  
12 percutaneous nephrolithotomy for treatment of calculi in hydronephrotic kidneys. Ann SurgInt.  
13 2016;2:015.
- 14 41. Inanloo SH, Yahyazadeh SR, Rashidi S, Amini E, Nowroozi MR, Ayayti M, et al. Feasibility and  
15 safety of ultrasonography guidance and flank position during percutaneous nephrolithotomy.  
16 2018;200(1):195-201.
- 17 42. Basiri A, Ziaee AM, Kianian HR, Mehrabi S, Karami H, Moghaddam SMH. Ultrasonographic versus  
18 fluoroscopic access for percutaneous nephrolithotomy: a randomized clinical trial. Journal of  
19 endourology. 2008;22(2):281-4.
- 20 43. Desai J, Zeng G, Zhao Z, Zhong W, Chen W, Wu W. A novel technique of ultra-mini-percutaneous  
21 nephrolithotomy: introduction and an initial experience for treatment of upper urinary calculi less than  
22 2 cm. BioMed research international. 2013;2013.
- 23 44. Yang Y-H, Wen Y-C, Chen K-C, Chen C. Ultrasound-guided versus fluoroscopy-guided  
24 percutaneous nephrolithotomy: a systematic review and meta-analysis. World journal of urology.  
25 2019;37(5):777-88.
- 26 45. Ng FC, Yam WL, Lim TYB, Teo JK, Ng KK, Lim SK. Ultrasound-guided percutaneous  
27 nephrolithotomy: advantages and limitations. Investigative and clinical urology. 2017;58(5):346-52.
- 28 46. Wang K, Zhang P, Xu X, Fan M. Ultrasonographic versus fluoroscopic access for percutaneous  
29 nephrolithotomy: a meta-analysis. Urologia internationalis. 2015;95(1):15-25.
- 30 47. Lojanapiwat B. The ideal puncture approach for PCNL: Fluoroscopy, ultrasound or endoscopy?  
31 Indian journal of urology: IJU: journal of the Urological Society of India. 2013;29(3):208.
- 32 48. Manohar T, Jain P, Desai M. Supine percutaneous nephrolithotomy: effective approach to high-  
33 risk and morbidly obese patients. Journal of endourology. 2007;21(1):44-9.
- 34 49. Jackman SV, Docimo SG, Cadeddu JA, Bishoff JT, Kavoussi LR, Jarrett TW. The “mini-perc”  
35 technique: a less invasive alternative to percutaneous nephrolithotomy. World journal of urology.  
36 1998;16(6):371-4.
- 37 50. Haghghi R, Zeraati H, Zade MG. Ultra-mini-percutaneous nephrolithotomy (PCNL) versus  
38 standard PCNL: A randomised clinical trial. Arab Journal of Urology. 2017;15(4):294-8.

39

40

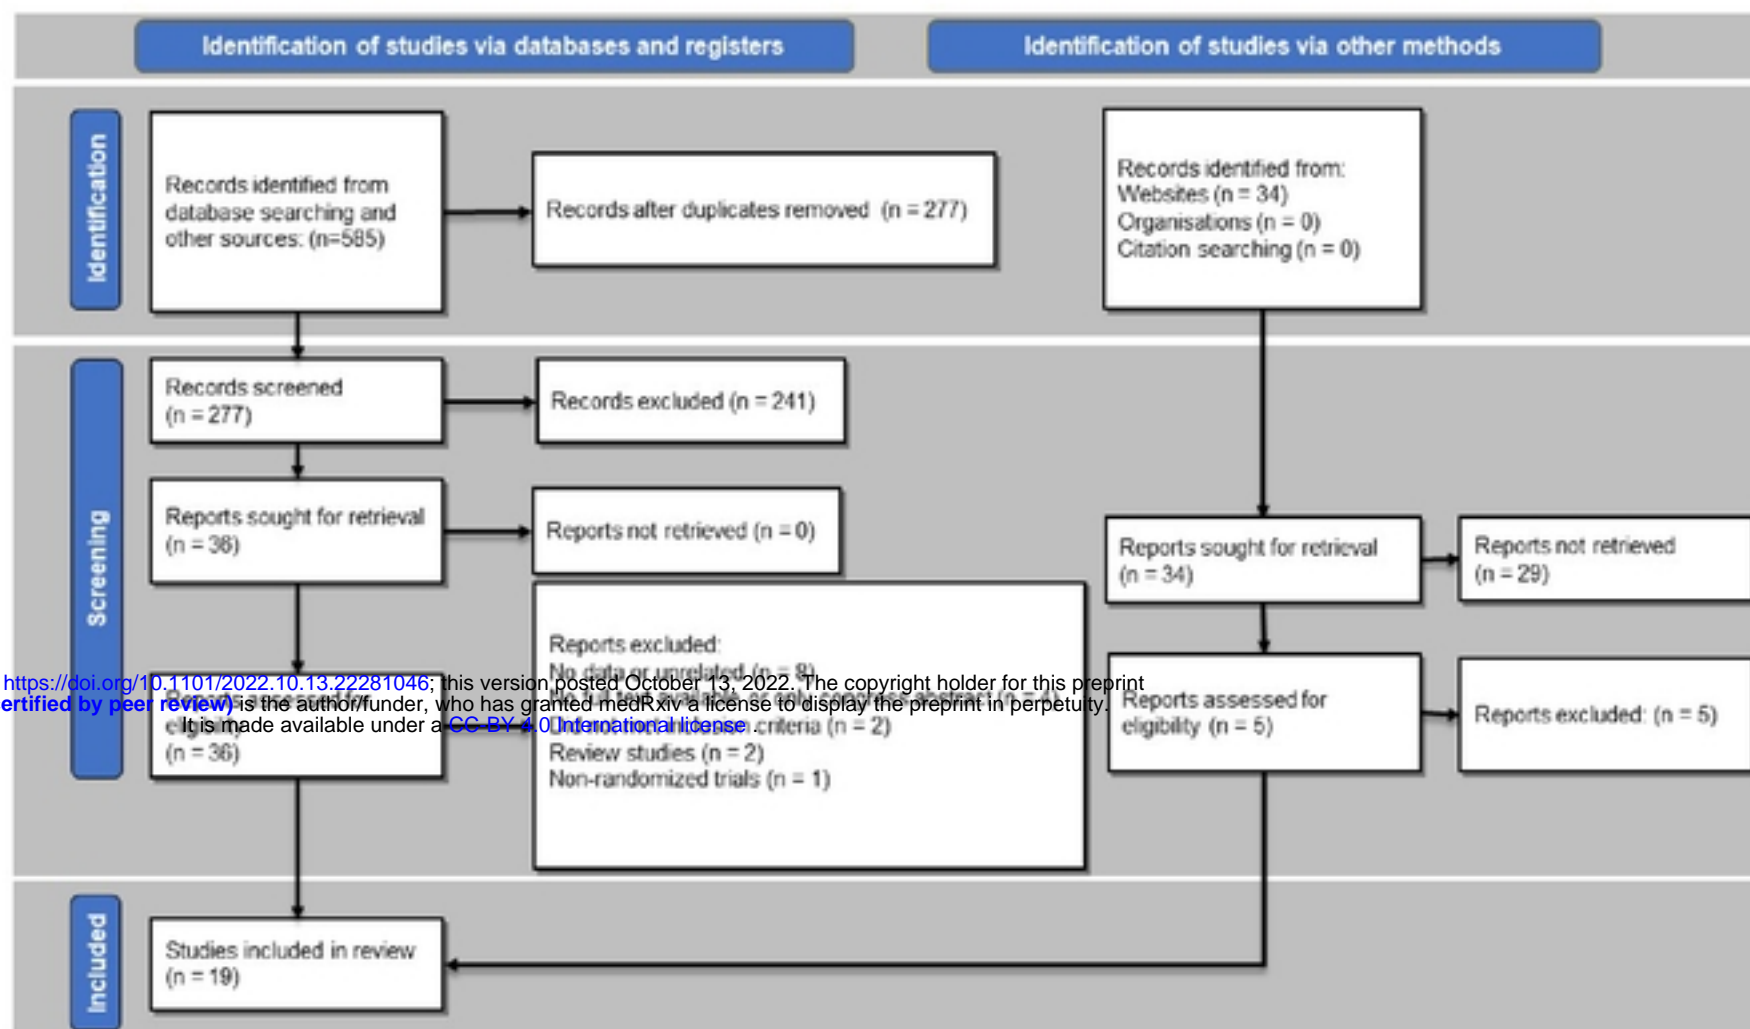

**Fig. 1:** PRISMA flowchart of the literature search and selection of the articles.

### (A) Stone-free rate

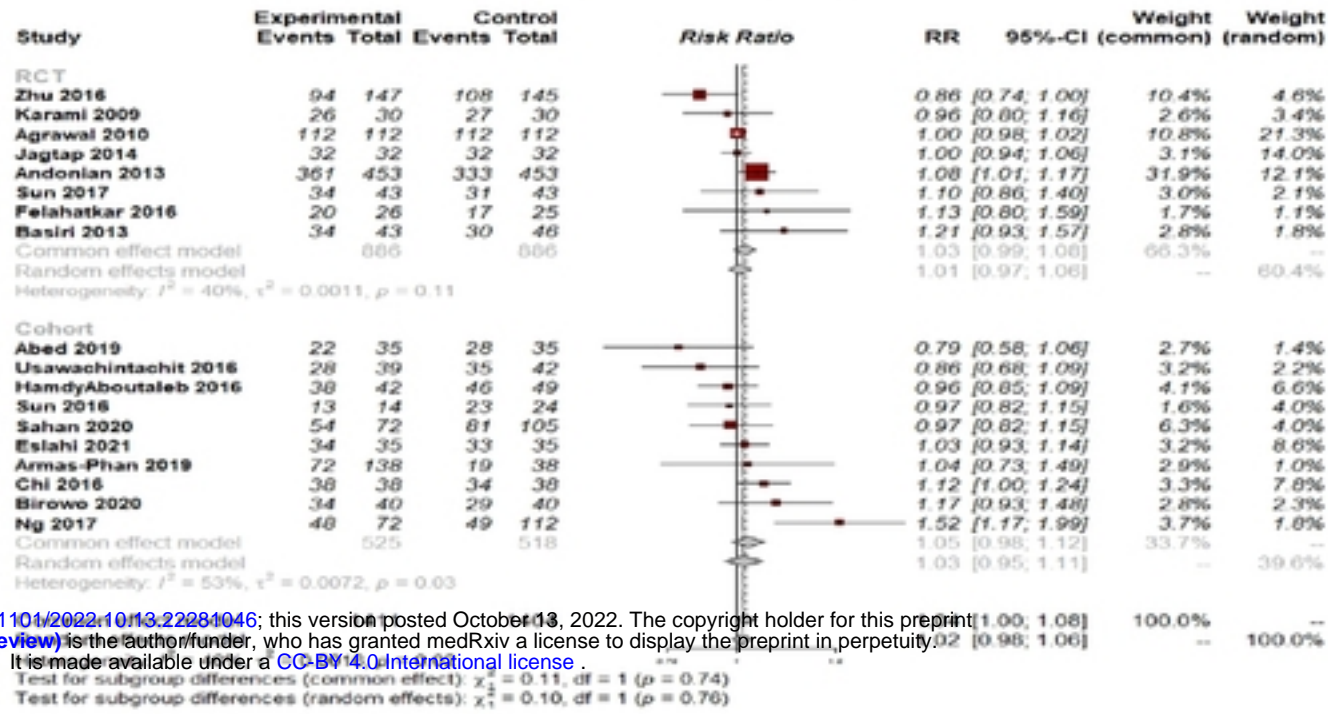

medRxiv preprint doi: <https://doi.org/10.1101/2022.10.13.22281046>; this version posted October 13, 2022. The copyright holder for this preprint (which was not certified by peer review) is the author/funder, who has granted medRxiv a license to display the preprint in perpetuity. It is made available under a CC-BY 4.0 International license.

### (B) Overall complications

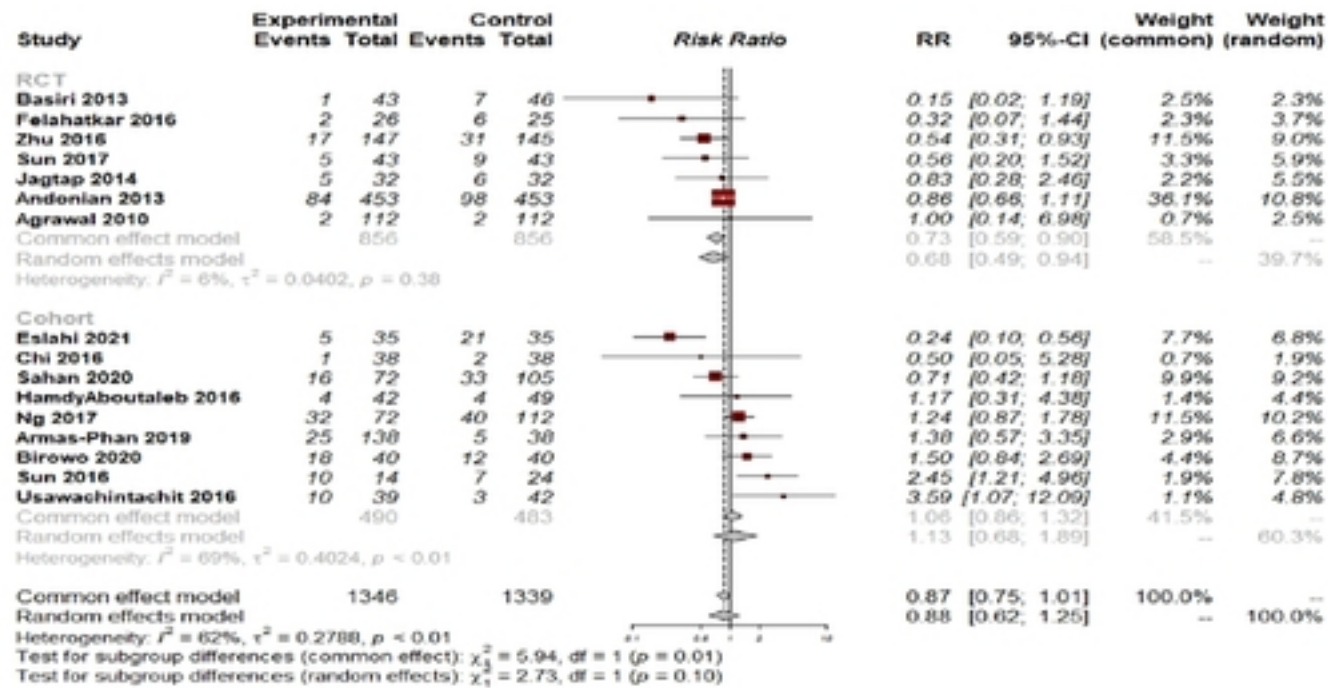

### (C) Duration of surgery

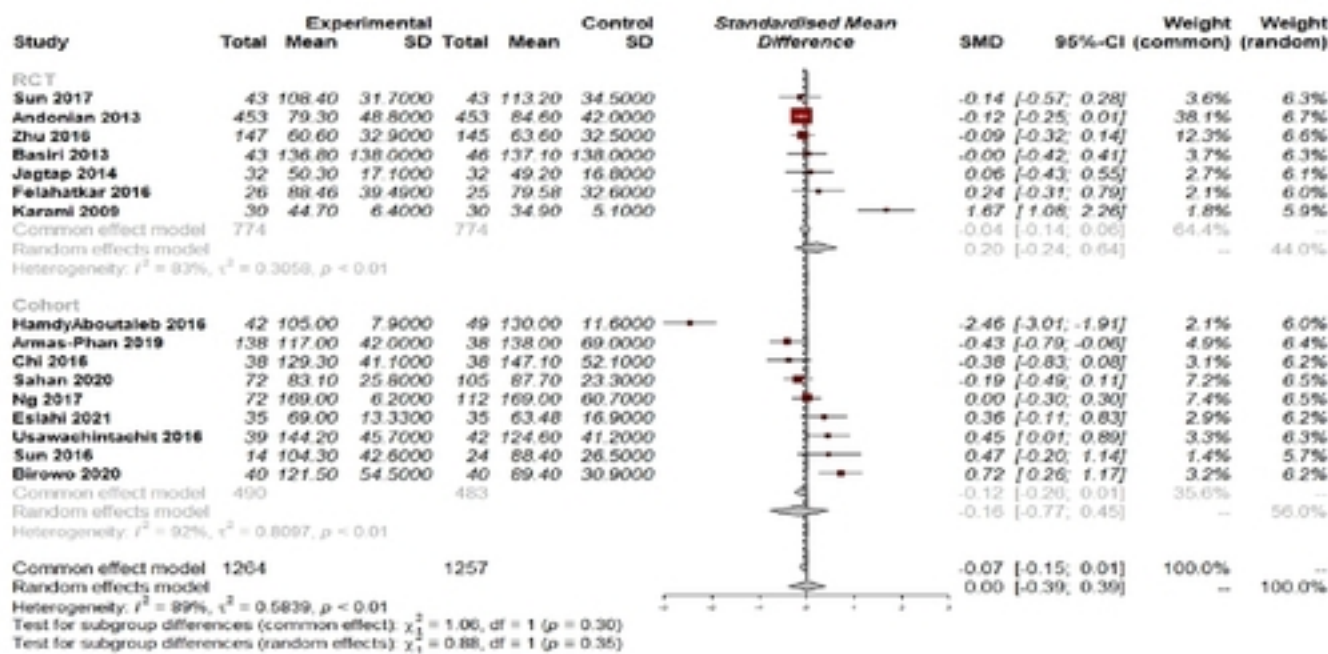

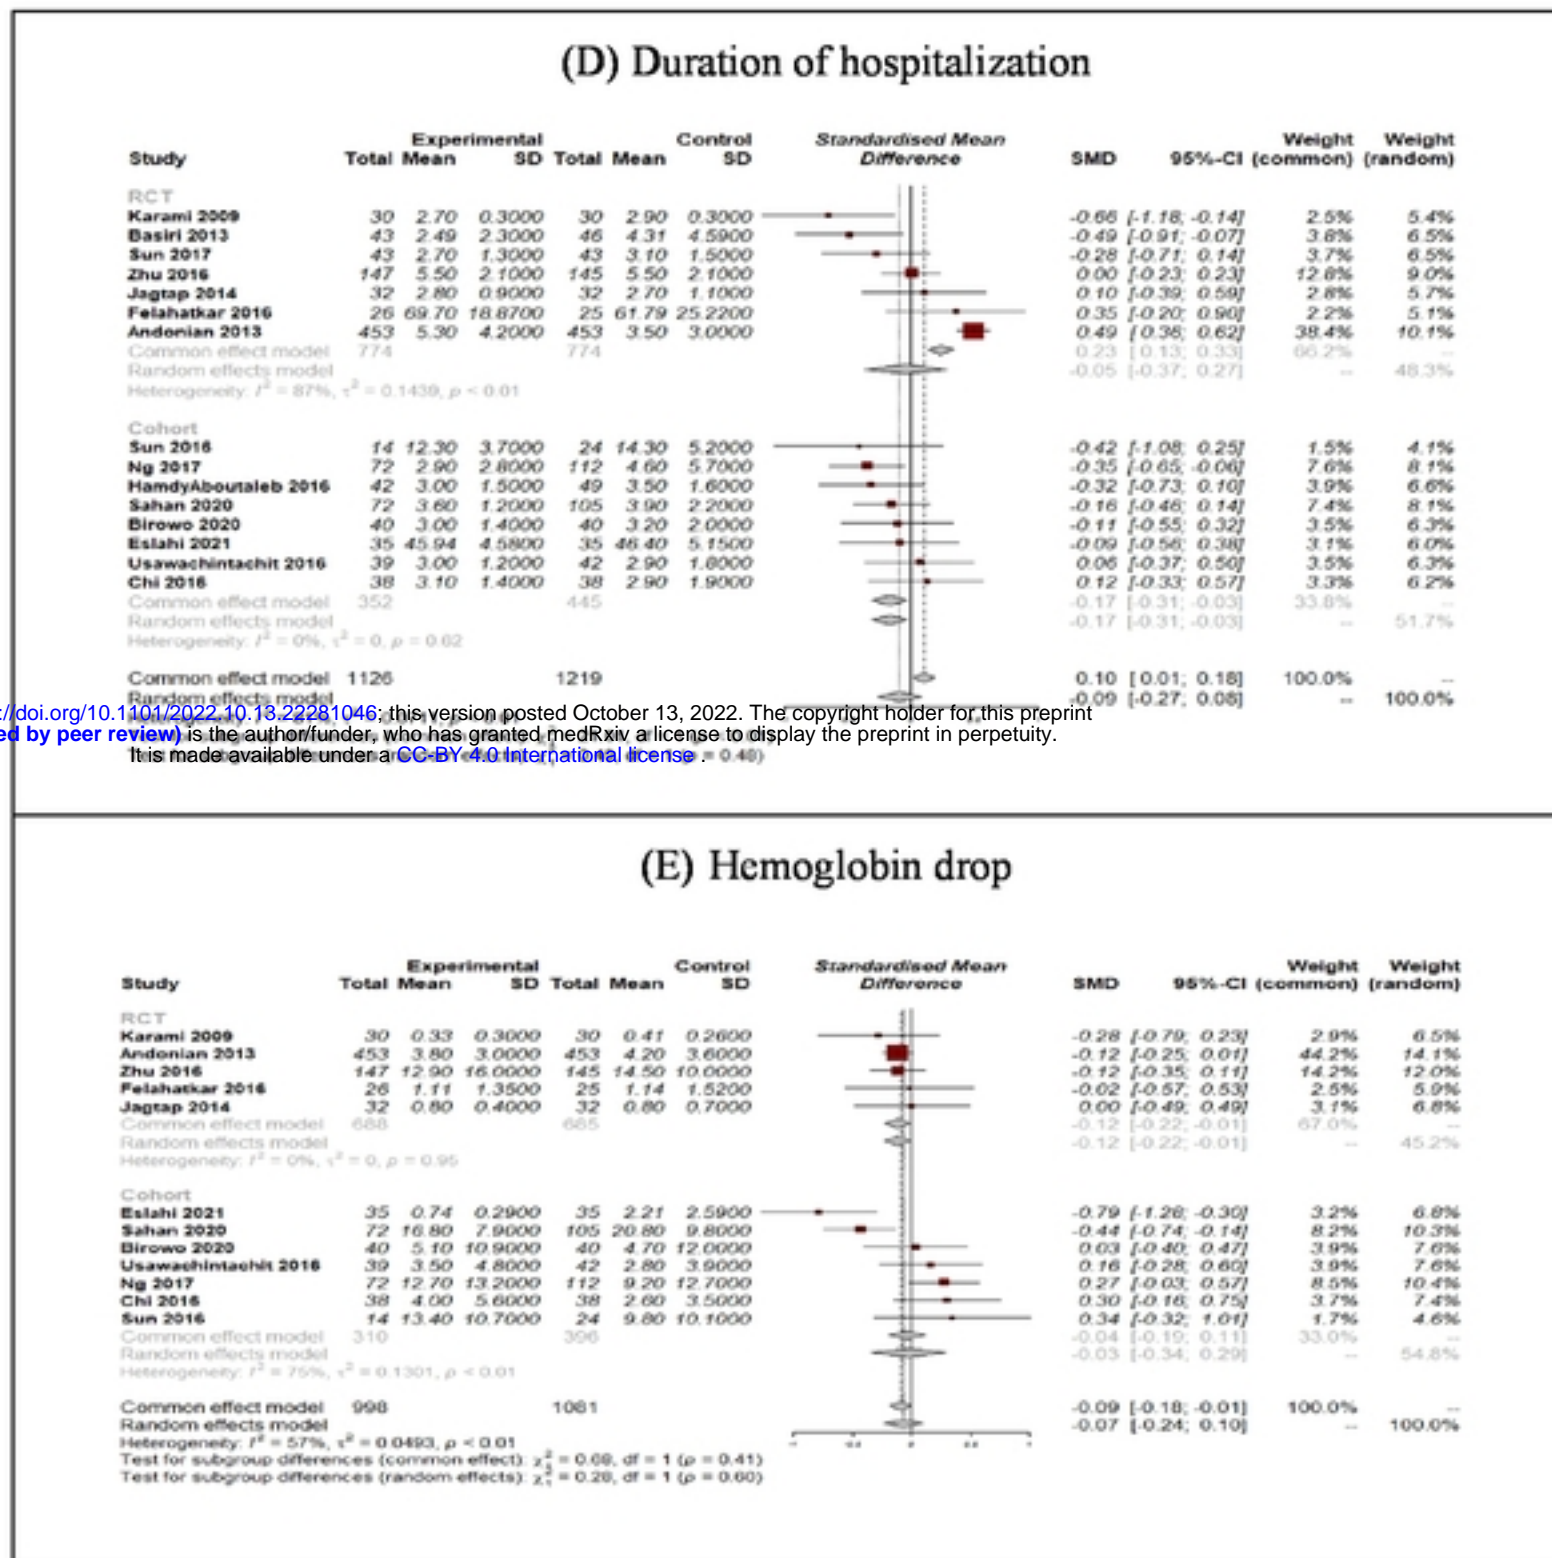

medRxiv preprint doi: <https://doi.org/10.1101/2022.10.13.22281046>; this version posted October 13, 2022. The copyright holder for this preprint (which was not certified by peer review) is the author/funder, who has granted medRxiv a license to display the preprint in perpetuity. It is made available under a [CC-BY 4.0 International license](https://creativecommons.org/licenses/by/4.0/).

**Fig. 2:** Forest plots of primary outcomes of UG-PCNL (experimental) versus FG-PCNL (control)



(A) Stone-free rate

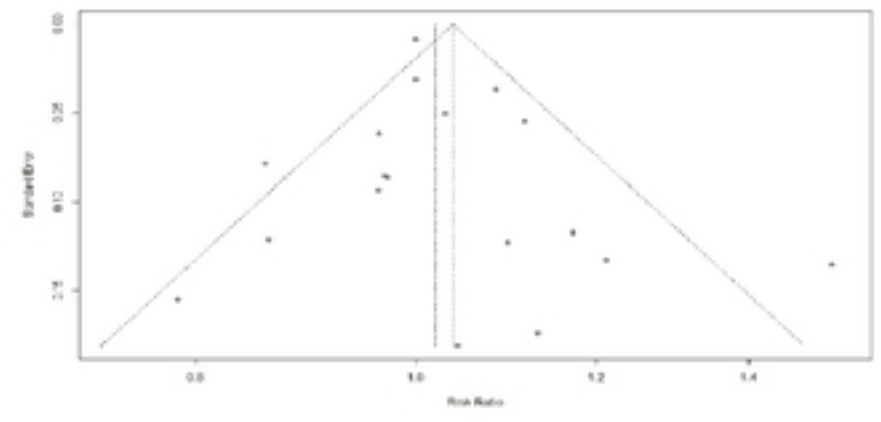

(B) Overall complications

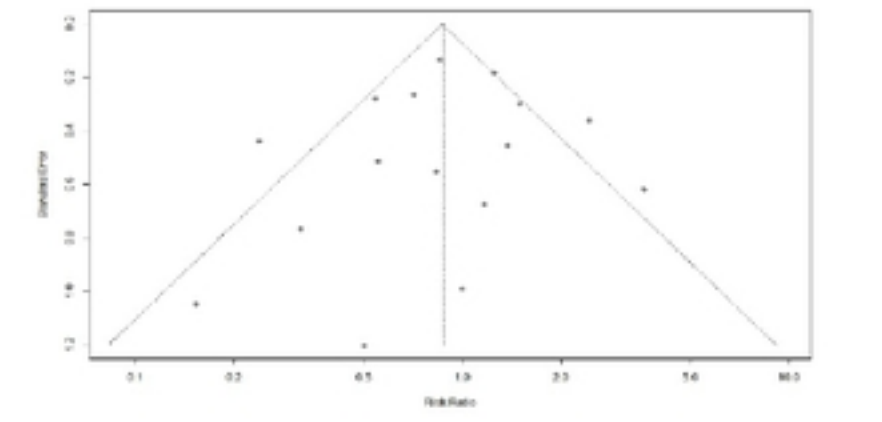

(C) Duration of surgery

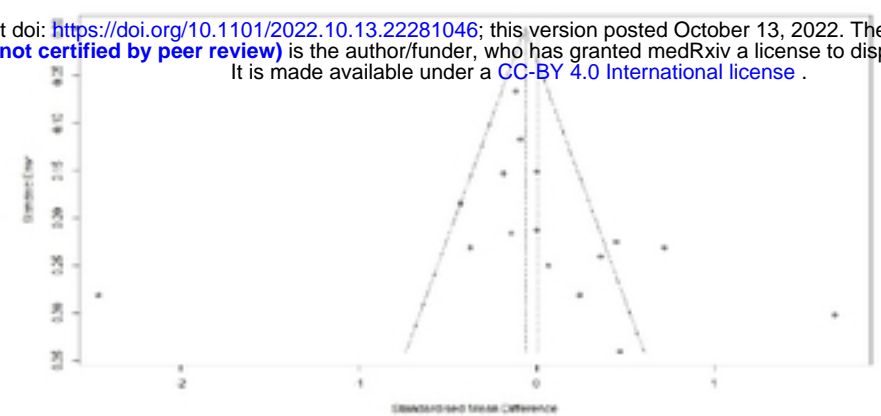

(D) Duration of hospitalization

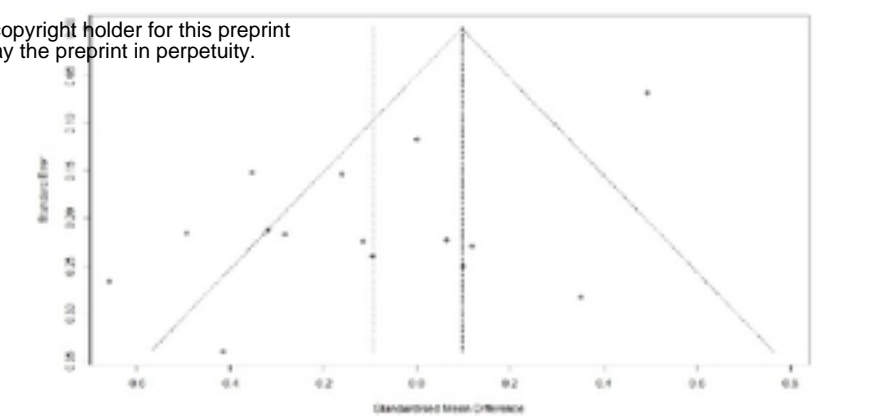

medRxiv preprint doi: <https://doi.org/10.1101/2022.10.13.22281046>; this version posted October 13, 2022. The copyright holder for this preprint (which was not certified by peer review) is the author/funder, who has granted medRxiv a license to display the preprint in perpetuity. It is made available under a [CC-BY 4.0 International license](https://creativecommons.org/licenses/by/4.0/).

(E) Hemoglobin drop

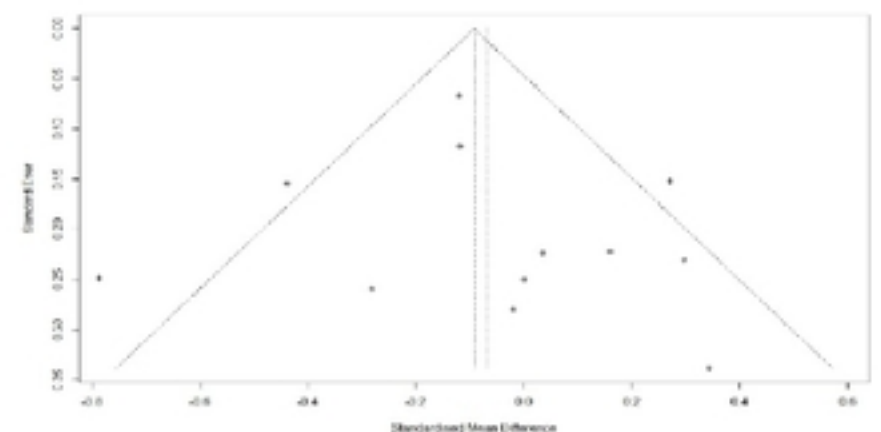

(F) Need for blood transfusion

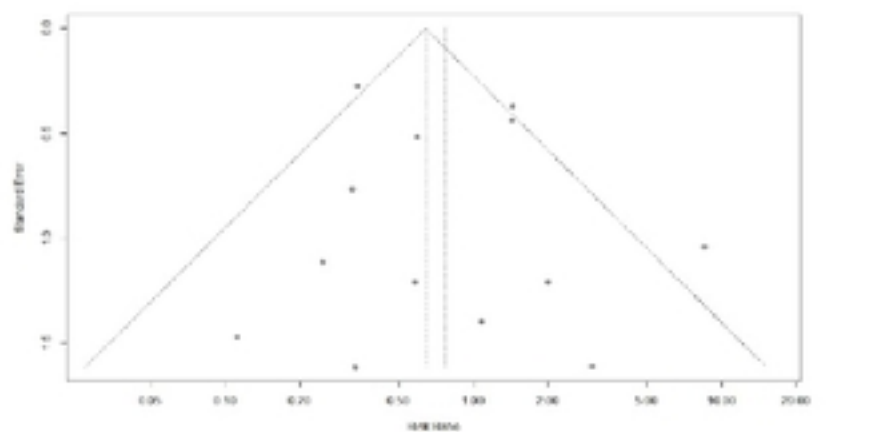

(G) Fever

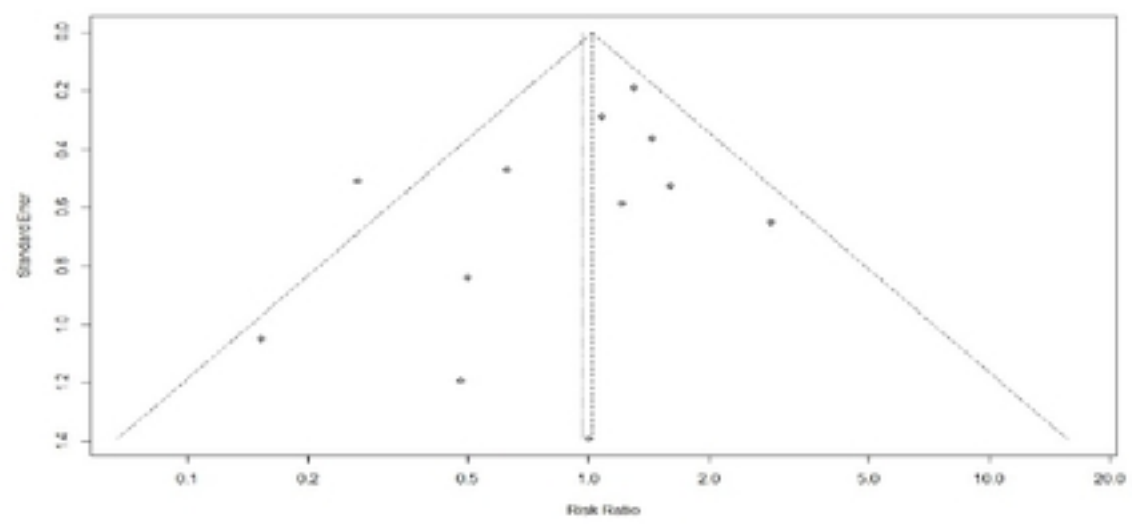

Fig. 3 Funnel plots of outcomes reported in at least 10 studies

### (A) Need for blood transfusion

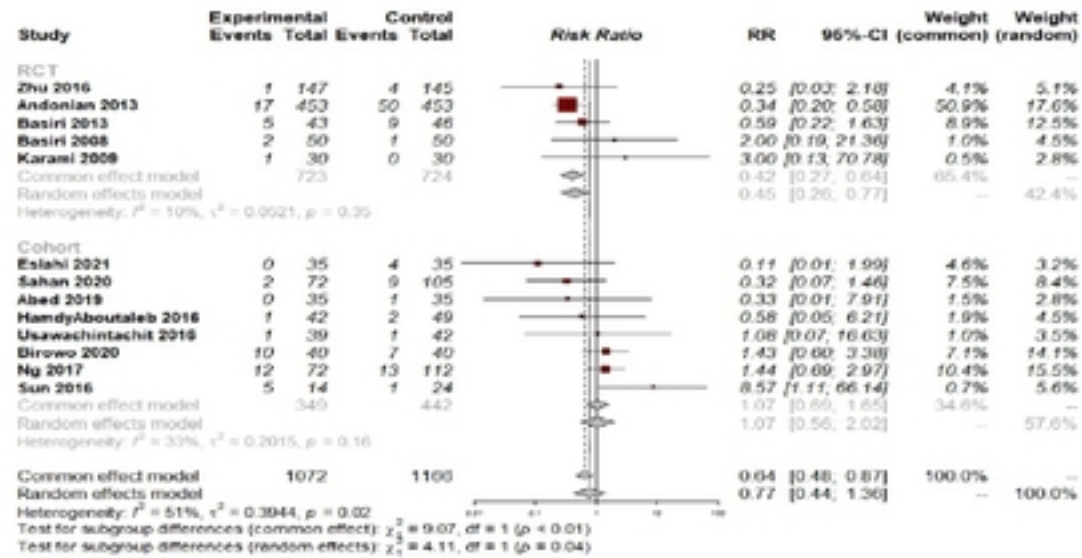

medRxiv preprint doi: <https://doi.org/10.1101/2022.10.13.22281046>; this version posted October 13, 2022. The copyright holder for this preprint (which was not certified by peer review) is the author/funder, who has granted medRxiv a license to display the preprint in perpetuity. It is made available under a [CC-BY 4.0 International license](https://creativecommons.org/licenses/by/4.0/).

### (B) Fever

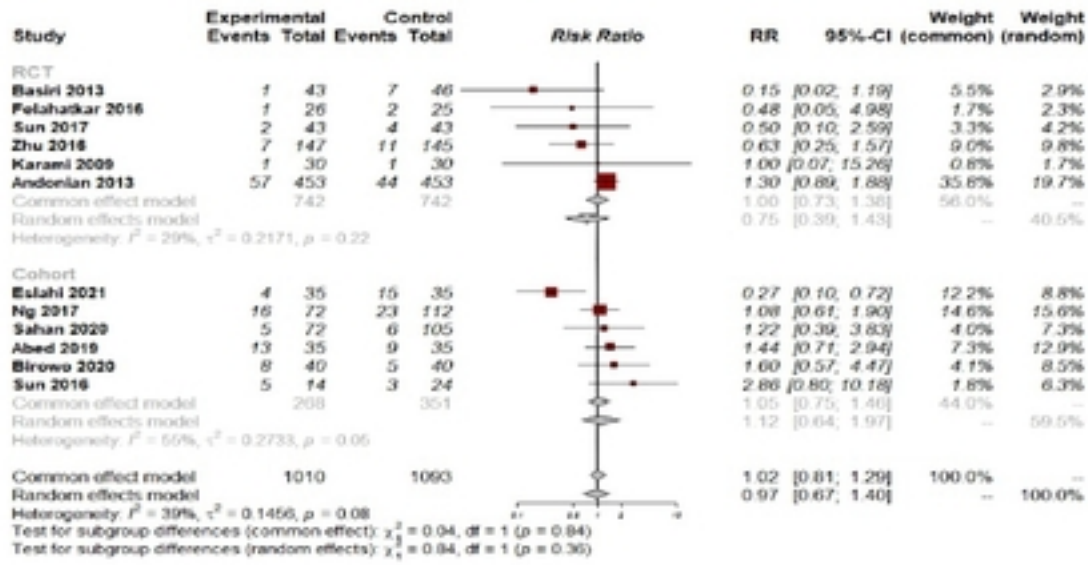

### (C) Radiation exposure

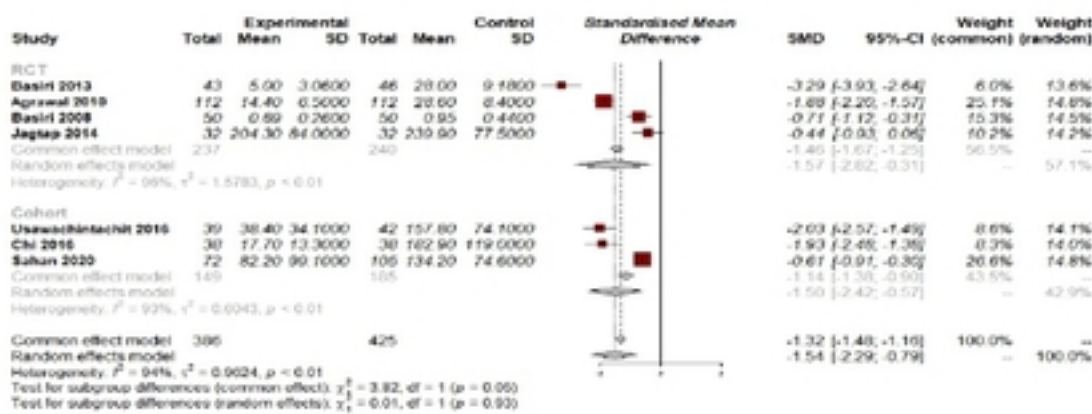

(D) Access time

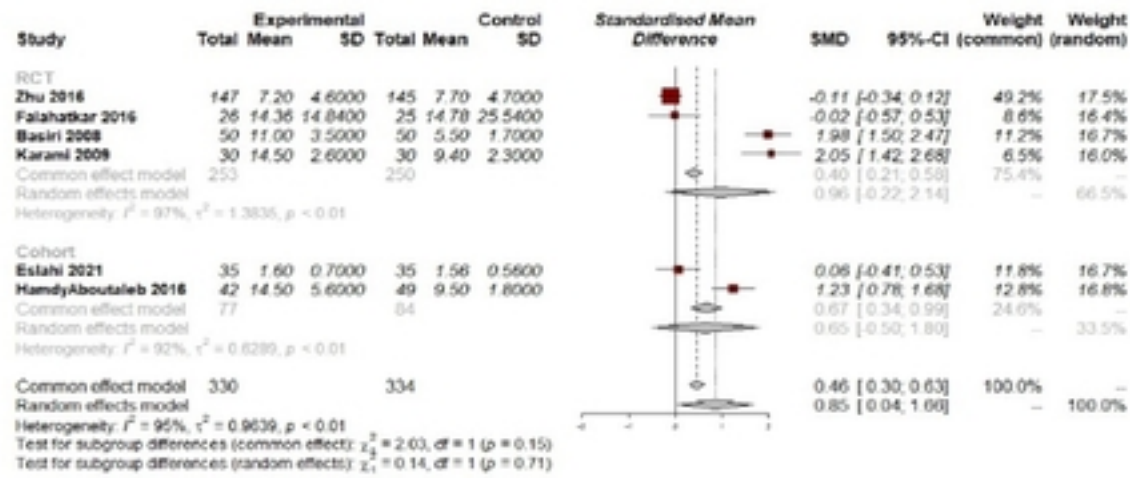

medRxiv preprint doi: <https://doi.org/10.1101/2022.10.13.22281046>; this version posted October 13, 2022. The copyright holder for this preprint (which was not certified by peer review) is the author/funder, who has granted medRxiv a license to display the preprint in perpetuity. It is made available under a [CC-BY 4.0 International license](https://creativecommons.org/licenses/by/4.0/).

(E) Number of attempts

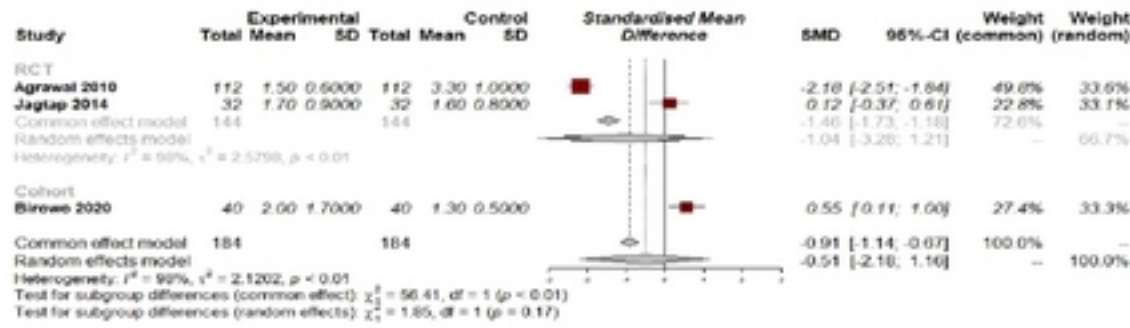

**Fig. 4** Forest plots of secondary outcomes of UG-PCNL (experimental) versus FG-PCNL (control)

(A) Stone-free rate

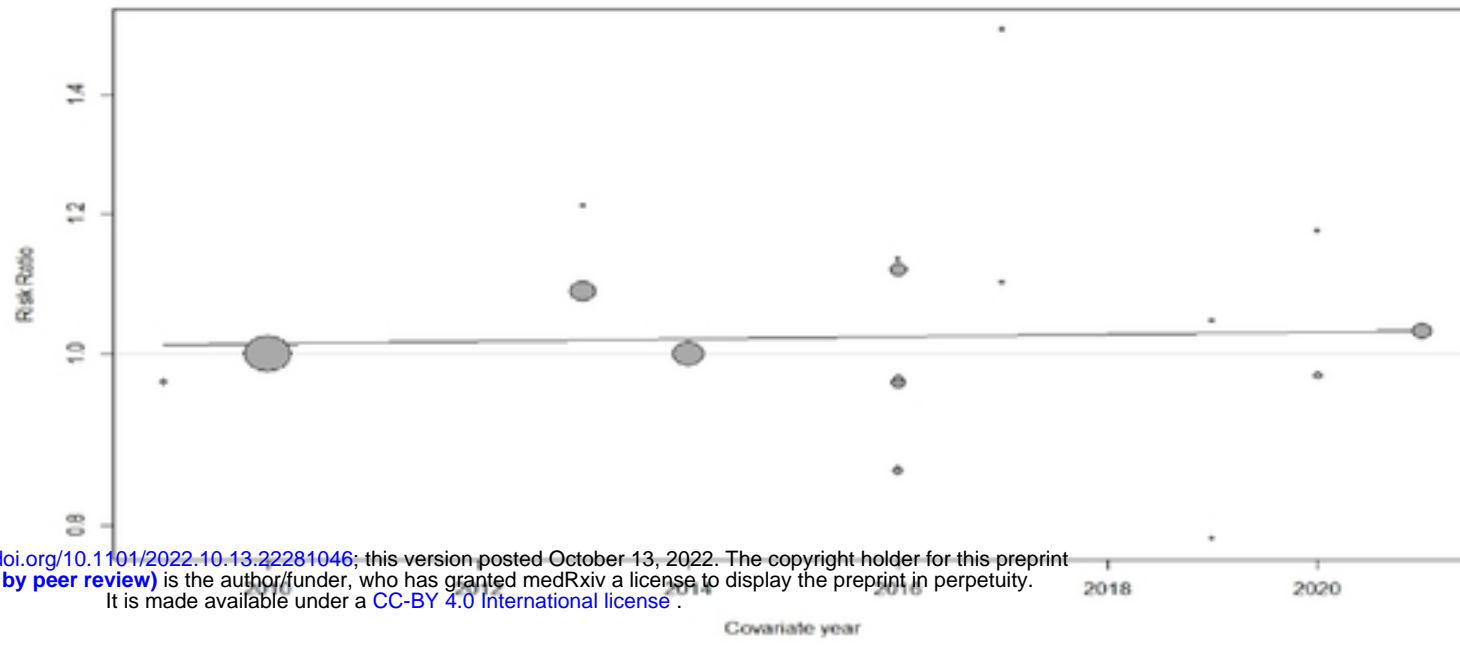

medRxiv preprint doi: <https://doi.org/10.1101/2022.10.13.22281046>; this version posted October 13, 2022. The copyright holder for this preprint (which was not certified by peer review) is the author/funder, who has granted medRxiv a license to display the preprint in perpetuity. It is made available under a [CC-BY 4.0 International license](https://creativecommons.org/licenses/by/4.0/).

(B) Overall complications

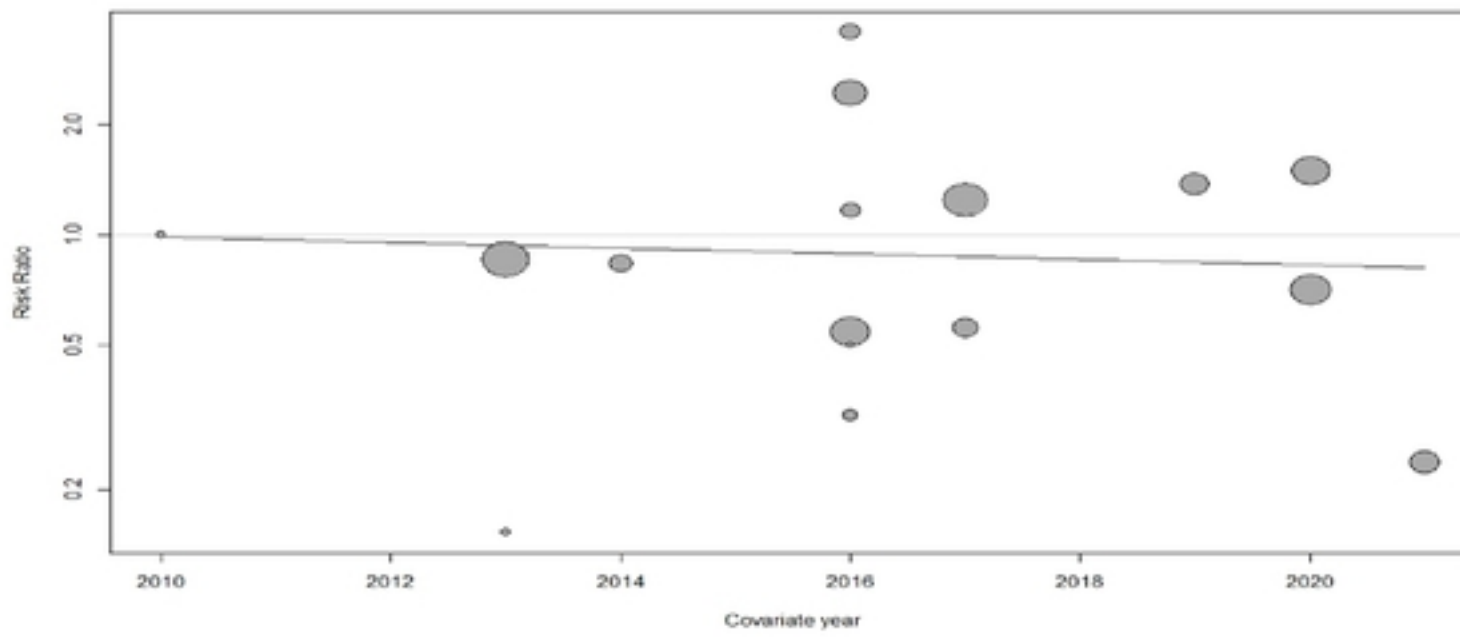

(C) Duration of surgery

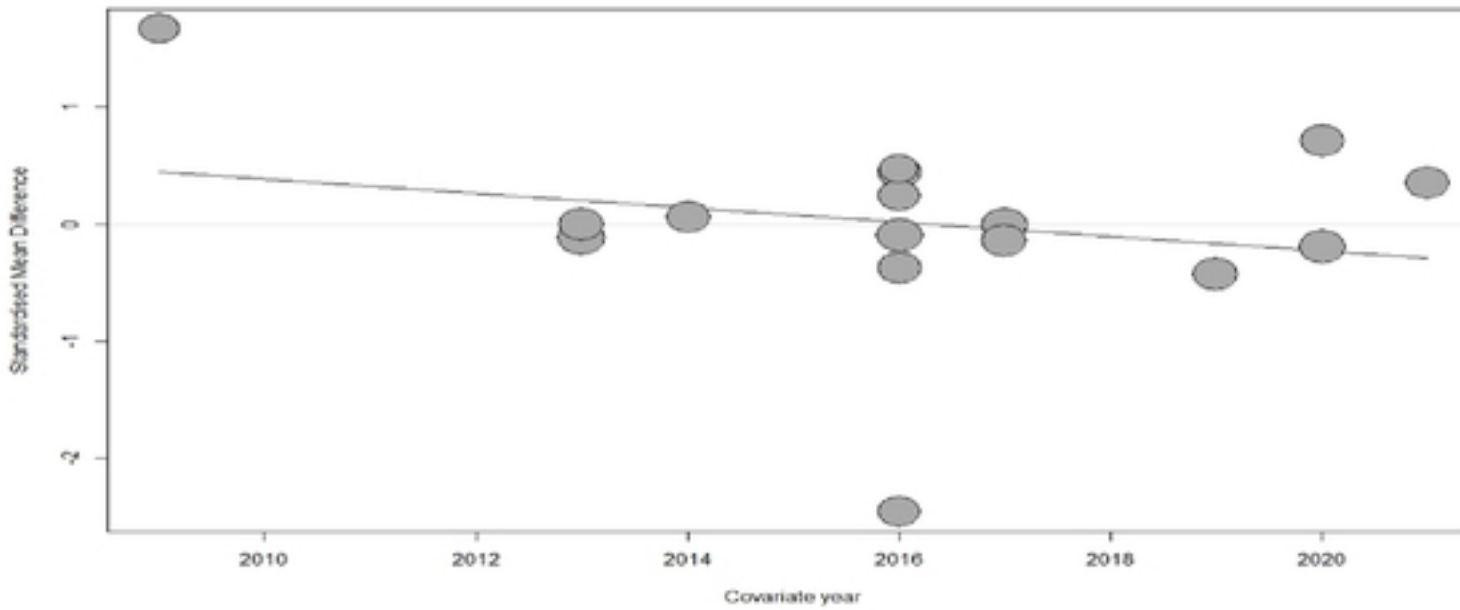

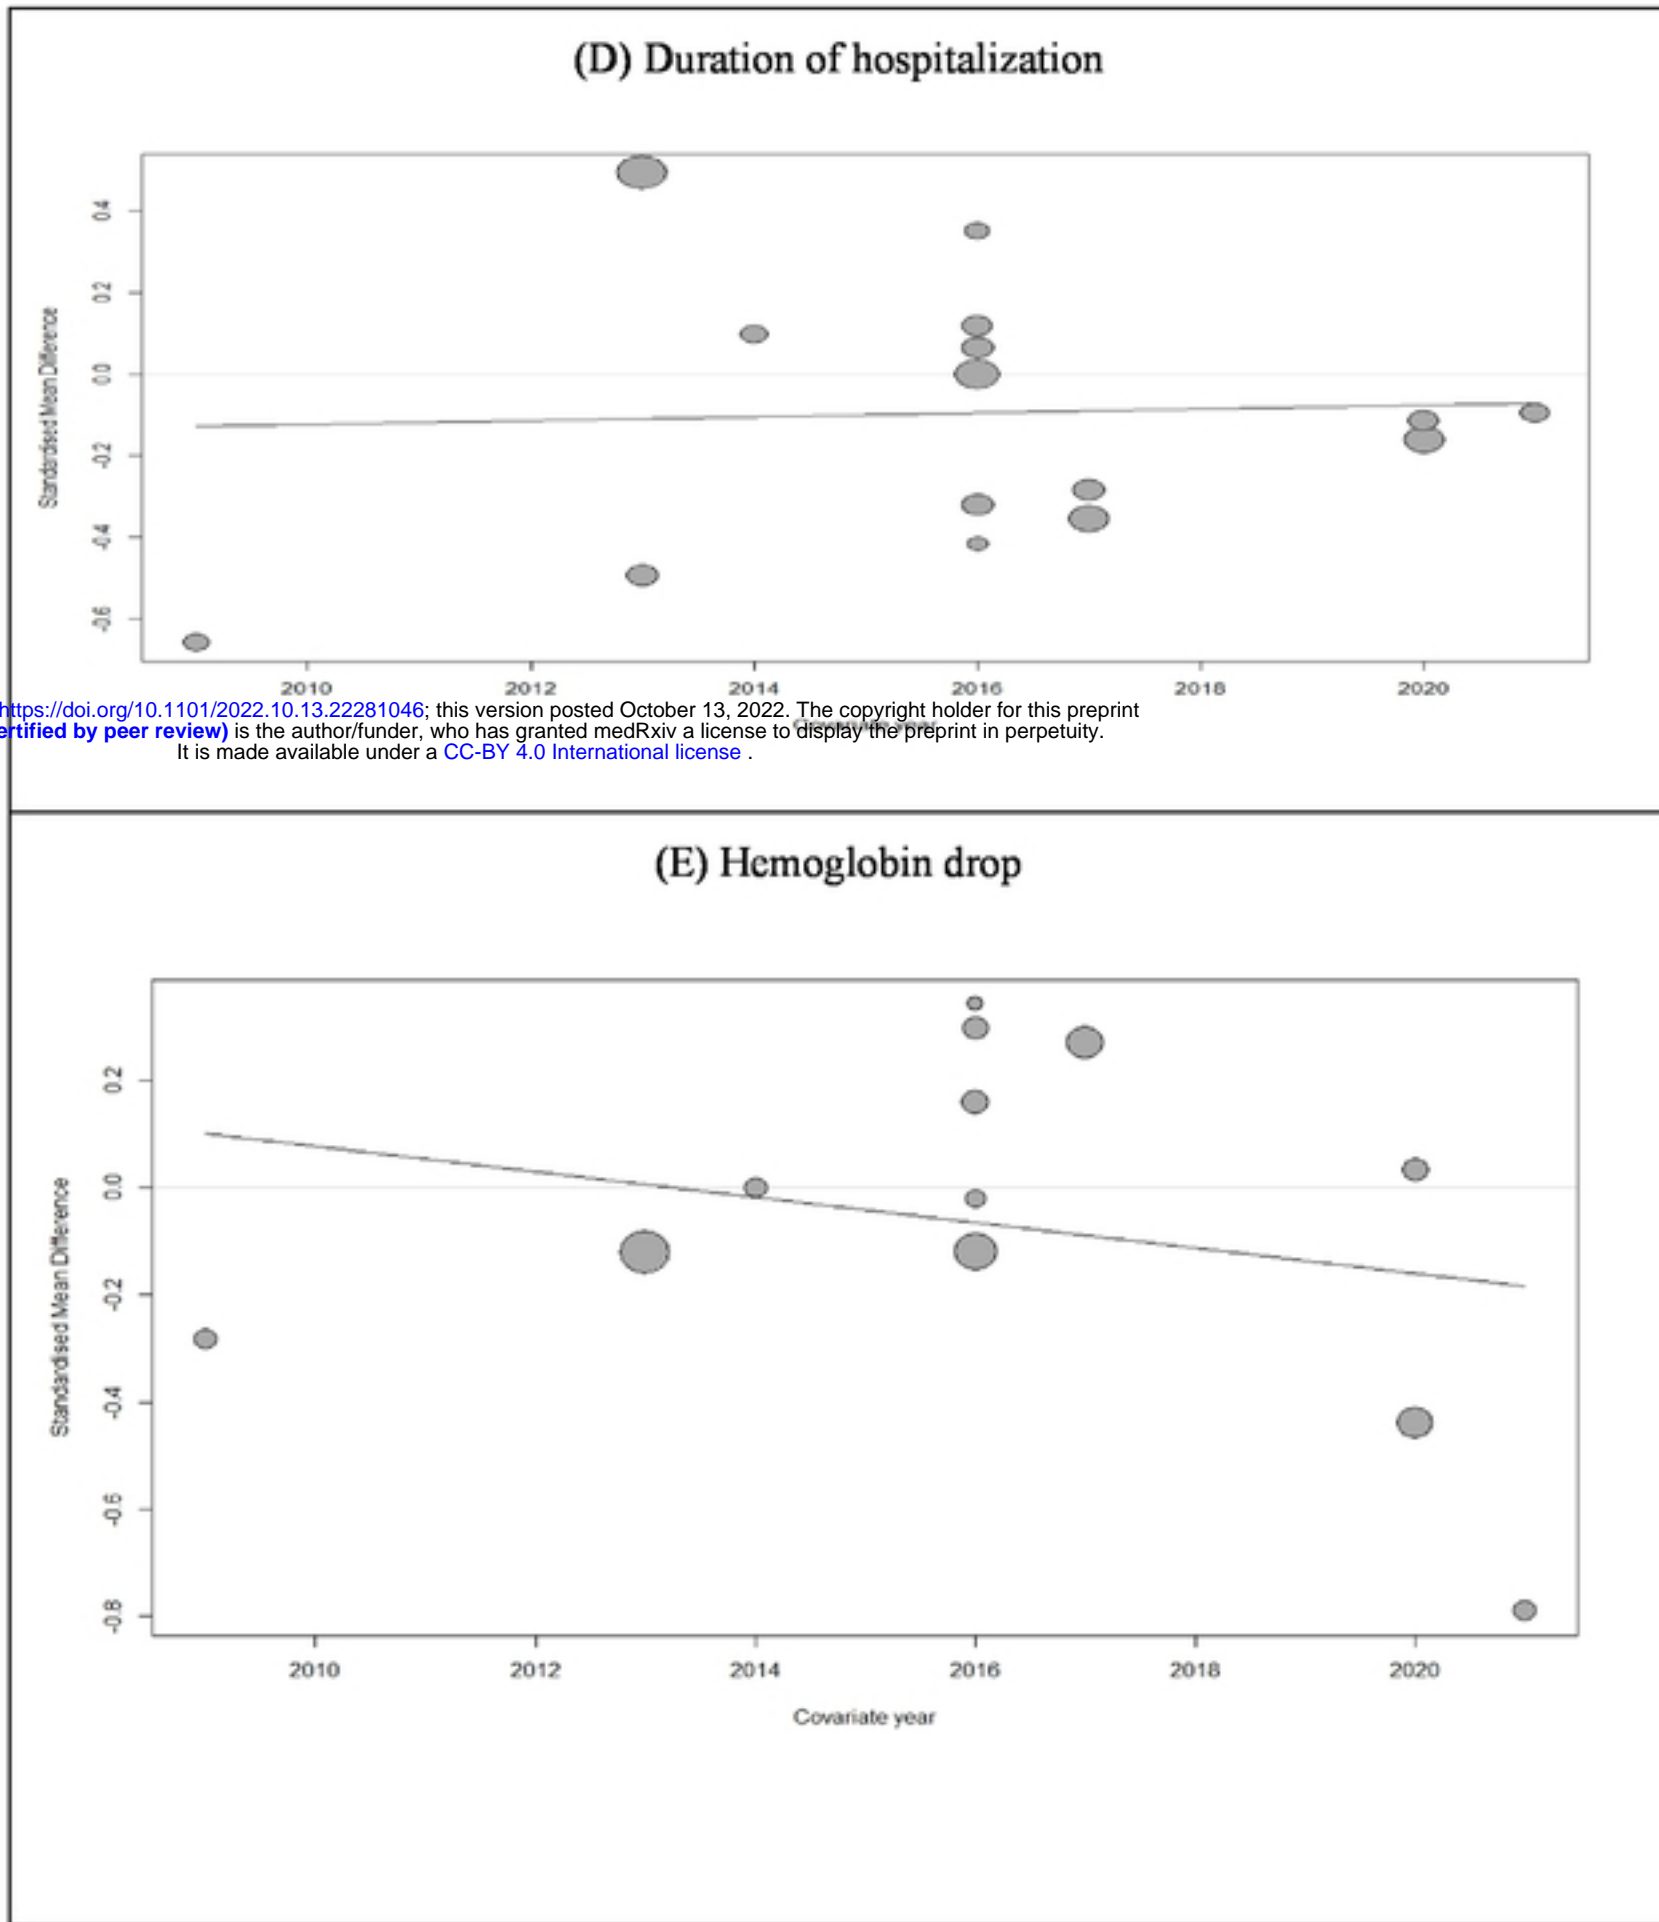

medRxiv preprint doi: <https://doi.org/10.1101/2022.10.13.22281046>; this version posted October 13, 2022. The copyright holder for this preprint (which was not certified by peer review) is the author/funder, who has granted medRxiv a license to display the preprint in perpetuity. It is made available under a [CC-BY 4.0 International license](https://creativecommons.org/licenses/by/4.0/).

**Fig. 5** Results of meta-regression. Effects of publication year and the experience of the clinician on primary outcomes

**Table 1. Characteristics of Included Studies**

| First Author            | Type of Study        | Cases (UG/FG) | Mean Age (UG/FG) | Sex Male n(UG/FG) | Mean BMI (UG/FG) | SFR (%)   | PCNL Technique                         | Multiple Stones | Stone Location (UG/FG)                                                                                                                                                          | Stone Burden           | Hydronephrosis Degree                                           | Ultrasound Probe | Sheath Size | Dilator                                      |
|-------------------------|----------------------|---------------|------------------|-------------------|------------------|-----------|----------------------------------------|-----------------|---------------------------------------------------------------------------------------------------------------------------------------------------------------------------------|------------------------|-----------------------------------------------------------------|------------------|-------------|----------------------------------------------|
| Basiri et al., 2008     | RCT                  | 50/50         | 40.7/41.6        | 34/31             | 25/24.6          | N/A       | Flank: 100/100                         | 0/0             | Inferior: 40/40<br>Middle: 7/9<br>Superior: 3/1                                                                                                                                 | 24/27                  | Mild: 28/32 -<br>Moderate: 40/42 -<br>Severe: 32/26             | 3.5 MHz          | 30 F        | Amplatz                                      |
| Karami et al., 2010     | RCT                  | 30/30         | 40.9/39.4        | 18/19             | 27.8/26          | 86.6/90   | Flank/Prone                            | 0/0             | Superior calyx: 3/2<br>Middle calyx: 7/7<br>Inferior calyx: 14/17<br>Renal pelvis: 6/4                                                                                          | 28.7/27.4              | Mild: 40/46 -<br>Moderate: 53/36 -<br>Severe: 6/16              | 3.5 MHz          | 28-30 F     | Amplatz                                      |
| Agarwal et al., 2011    | RCT                  | 112/112       | 31/35            | N/A               | N/A              | 100/100   | Prone: 100/100                         | N/A             | N/A                                                                                                                                                                             | 280/230mm <sup>2</sup> | N/A                                                             | 3.5 MHz          | 26-28 F     | Amplatz                                      |
| Andonian et al., 2013   | Cohort               | 453/453       | 50.2/47.9        | 62.5%/37.5%       | N/A              | 79.8/73.5 | Prone: 93.8/84.1 -<br>Supine: 6.2/15.9 | 56.3/67.5       | Upper calyx: 8.9/8.8<br>Middle calyx: 39.2/11.1<br>Lower calyx: 44.8/68.1<br>Multiple calyces: 7.1/11.9                                                                         | 349/456.6              | N/A                                                             | N/A              | 22.6/29.5   | Balloon: 9.9/58.7 -<br>Telescopic: 90.2/41.2 |
| Basiri et al., 2013     | RCT                  | 43/46         | 45.7/44.8        | 30/31             | 25.29/24.86      | 73.9/65.2 | Supine/Prone                           | 30/43           | Renal pelvis: 16/15<br>Inferior calyx: 10/8<br>Middle calyx: 4/3<br>Renal pelvis + inferior calyx: 7/10<br>Renal pelvis + middle calyx: 1/8<br>Middle and inferior calices: 5/2 | N/A                    | N/A                                                             | 3.5 MHz          | 28-30 F     | Amplatz                                      |
| Jagtap et al., 2014     | RCT                  | 32/32         | 40.7/44.5        | 25/20             | N/A              | 100/100   | Prone: 100/100                         | 9/6             | Superior calyx: 3/2<br>Middle calyx: 3/7<br>Inferior calyx: 10/10<br>Renal pelvis: 13/11                                                                                        | 21/22                  | Mild: 40/46 -<br>Moderate: 34/31 -<br>Severe: 6/6               | 3.5 MHz          | 28 F        | Amplatz                                      |
| Falahatkar et al., 2016 | RCT                  | 26/25         | 48.41/51.17      | 17/15             | 28.14/26.31      | 76.9/68   | Supine: 100/100                        | N/A             | N/A                                                                                                                                                                             | 26.48/30.44            | N/A                                                             | N/A              | N/A         | Amplatz                                      |
| Chi et al., 2016        | Cohort               | 38/38         | 52.7/52.9        | 17/19             | 26.1/30.3        | 100/89.4  | Prone: 100/100                         | 18.4/5.3        | Calyceal: 12(31.6)/9(23.7)<br>Renal pelvis: 10(26.3)/14(36.8)<br>Proximal urethral: 3(7.9)/7(18.4)                                                                              | N/A                    | Mild: 21.1/24.2 -<br>Moderate: 21.1/21.1 -<br>Severe: 5.2/5.2   | N/A              | 24-30 F     | Balloon                                      |
| Sun et al., 2016        | Retrospective Cohort | 20/25         | 49.2/47.3        | 14/17             | 24.5/22.8        | 92.8/95.8 | Prone: 100/100                         | 60/56           | Pelvis or proximal urether: 4/5                                                                                                                                                 | N/A                    | None or mild: 40/60 -<br>Moderate or Severe: 60/40              | N/A              | 18 F        | N/A                                          |
| Hamdy et al., 2016      | Retrospective Cohort | 42/49         | 40.2/43          | 35/39             | N/A              | 80/83.7   | Prone: 100/100                         | N/A             | N/A                                                                                                                                                                             | N/A                    | Mild: 33.3/77.5 -<br>Moderate: 23.8/18.3 -<br>Severe: 42.8/4    | 3.5-5 MHz        | 30 F        | Amplatz                                      |
| Usawa et al., 2016      | Cohort               | 93/42         | 51.7/54.4        | 38/15             | 28.7/30.4        | 77.4/83.4 | Prone: 100/100                         | 16.1/7.1        | Calyceal: 22(23.7)/12(28.6)<br>Pelvic: 23(24.7)/11(26.2)                                                                                                                        | N/A                    | Mild: 34.4/28.6 -<br>Moderate: 16.1/21.4 -<br>Severe: 6.5/4.8   | 3.5 MHz          | N/A         | N/A                                          |
| Ng et al., 2017         | Cohort               | 72/112        | 55.6/52.6        | 50/87             | N/A              | 66.7/43.7 | Prone: 100/100                         | N/A             | N/A                                                                                                                                                                             | N/A                    | Mild: 44.4/37.5 -<br>Moderate: 18.1/23.2 -<br>Severe: 15.3/16.1 | N/A              | 30 F        | Amplatz                                      |
| Sun et al., 2017        | RCT                  | 43/43         | 42.9/45.1        | 29/32             | 24.2/24.5        | 79.1/69.8 | Supine: 100/100                        | N/A             | Renal pelvis: 15/17<br>Inferior calyx: 11/10<br>Middle calyx: 5/4<br>Renal pelvis + inferior calyx: 7/6                                                                         | 29.4/30.1              | N/A                                                             | 3.5 MHz          | 30 F        | Amplatz                                      |

| First Author            | Type of Study        | Cases (UG/FG) | Mean Age (UG/FG) | Sex Male n(UG/FG) | Mean BMI (UG/FG) | SFR (%)   | PCNL Technique | Multiple Stones | Stone Location (UG/FG)                                                | Stone Burden                | Hydronephrosis Degree                                    | Ultrasound Probe | Sheath Size | Dilator |
|-------------------------|----------------------|---------------|------------------|-------------------|------------------|-----------|----------------|-----------------|-----------------------------------------------------------------------|-----------------------------|----------------------------------------------------------|------------------|-------------|---------|
|                         |                      |               |                  |                   |                  |           |                |                 | Renal pelvis + middle calyx: 1/3<br>Middle and inferior callices:4/3  |                             |                                                          |                  |             |         |
| Zhu et al., 2017        | RCT                  | 147/145       | 49.9/49.6        | 86/77             | 23.7/23.5        | 55.1/62.8 | Prone: 100/100 | 89/84           | Superior calyx: 44/46<br>Middle calyx: 92/74<br>Inferior calyx: 26/59 | 838.3/834.8 mm <sup>2</sup> | None or mild: 59/64.8 - Moderate or Severe: 40.8/35      | N/A              | 18 F        | N/A     |
| Armas-phan et al., 2018 | Cohort               | 138/38        | 54.6/51          | 63/18             | 28.8/30.1        | 57/56     | Prone: 71/29   | N/A             | N/A                                                                   | 30/32                       | Yes (n) : 65/15                                          | N/A              | 24 F        | Balloon |
| Abed et al., 2019       | Cohort               | 35/35         | N/A              | 18/20             | N/A              | 62.9/80   | Prone: 100/100 | N/A             | N/A                                                                   | N/A                         |                                                          | N/A              | 26 F        | Amplatz |
| Sahan et al., 2020      | Retrospective Cohort | 72/105        | 49.2/48.3        | 34/26             | N/A              | 75/77.1   | Prone: 100/100 | 36.7/45.7       | Upper calyx: 28(38.9)/23(21.9)                                        | N/A                         | None or mild: 30.6/40.9 - Moderate or Severe: 69.4/59.1  | N/A              | 26 F        | Amplatz |
| Birowo et al., 2020     | Cohort               | 40/80         | 49.2/54.3        | 17/47             | 25.3/25          | 85/75     | Prone: 0/50    | 40/55           | N/A                                                                   | 27.5/34.25                  | Yes: 50/38.75                                            | N/A              | 28-30 F     | Amplatz |
| Eslahi et al., 2021     | Cohort               | 35/35         | 5.68/7.47        | 25/23             | N/A              | 97.1/94.3 | Prone: 100/100 |                 | N/A                                                                   | 15.94/19.2                  | Mild: 57.1/51.4 - Moderate: 34.3/37.1 - Severe: 8.6/11.4 | 3.5 MHz          | 15 F        | Amplatz |

**Abbreviations:** UG: Ultrasound-guided; FG: Fluoroscopy-guided; RCT: Randomized Clinical Trial; BMI: Body mass index; SFR: Stone-free rate; PCNL: Percutaneous Nephrolithotomy
